# Supplementary material
Source: Springer Nature journal article supplement (https://www.springermedizin.de/resource/supplementary/13053_2009_143_MOESM6_ESM.pdf/9674286)

time point\*subjective risk; LS Means  
Current effect:  $F(8, 415)=1.2631, p=.26113$   
Effective hypothesis decomposition  
Vertical bars denote +/- standard errors

- Population
- Low
- Moderate
- High
- Affected

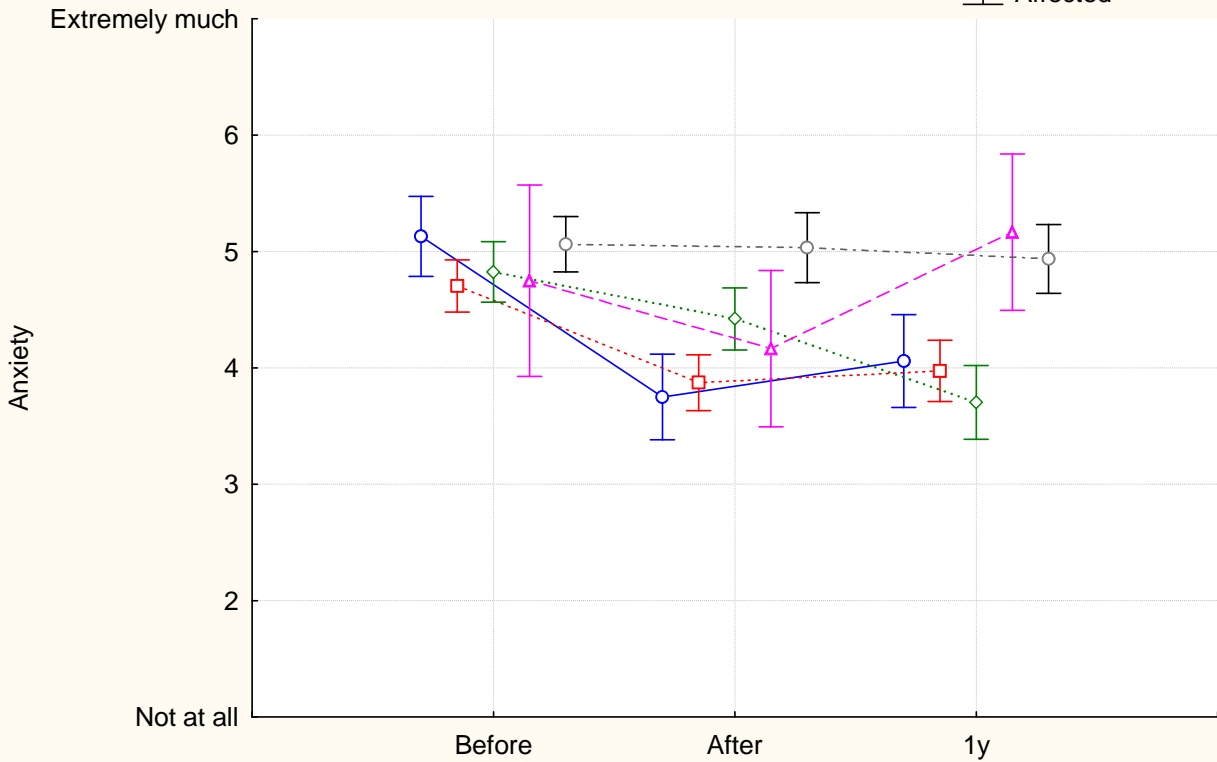

Supplement: MOESM6 [file 9674286]
